# Supplementary material for: Engineering an effective noble-metal-free photocatalyst for hydrogen evolution: hollow hexagonal porous micro-rods assembled from In2O3@carbon core–shell nanoparticles
Source: Royal Society of Chemistry journal article supplement (doi:10.1039/c8ta04916e), 2018-01-01
Supplement: c8ta04916e1.pdf [file c8ta04916e1.pdf]

## Supplementary Information

### **Engineering an Effective Noble-Metal-Free Photocatalyst for Hydrogen Evolution: Hollow Hexagonal Porous Micro-rod Assembled by In<sub>2</sub>O<sub>3</sub>@Carbon Core-Shell Nanoparticles**

*Rong Li,<sup>a †</sup> Liming Sun,<sup>a †</sup> Wenwen Zhan,<sup>a †</sup> Yan-An Li,<sup>b</sup> Xiaojun Wang,<sup>a</sup> Xiguang  
Han<sup>a \*</sup>*

<sup>a</sup>Jiangsu Key Laboratory of Green Synthetic Chemistry for Functional Materials, Department of  
Chemistry, School of Chemistry and Chemical Engineering, Jiangsu Normal University, Xuzhou,  
221116 (P. R. China). \*E-mail: xghan@jsnu.edu.cn.

<sup>b</sup>College of Chemistry, Chemical Engineering and Materials Science, Shandong Normal University,  
Jinan 250014, People's Republic of China

<sup>†</sup>These authors contributed equally.

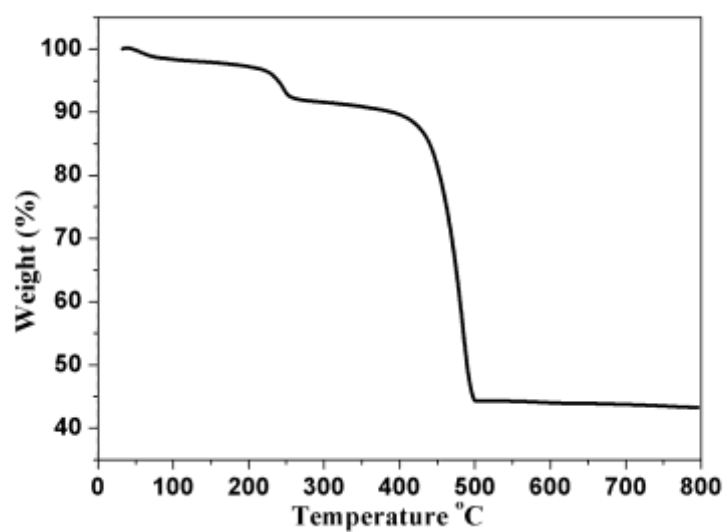

**Figure S1.** TGA curves of the as-obtained In-MIL-68 hexagonal micro-rods precursor.

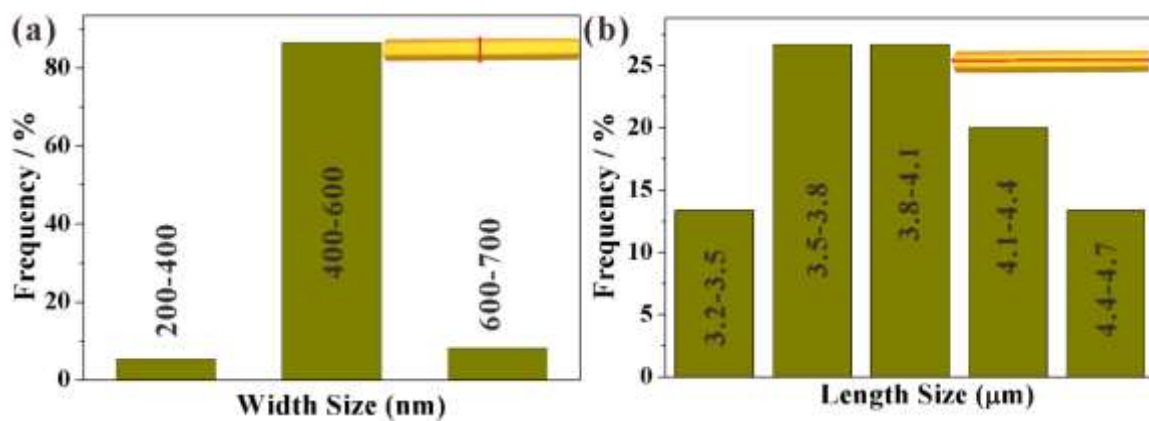

**Figure S2.** The sizes of In-MIL-68 hexagonal micro-rods precursor.

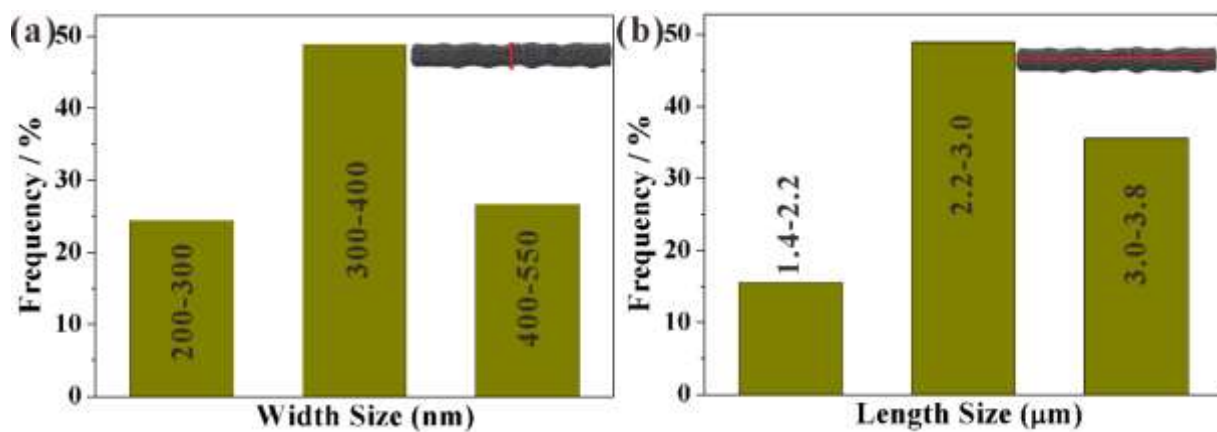

**Figure S3.** The sizes of PHIC particles.

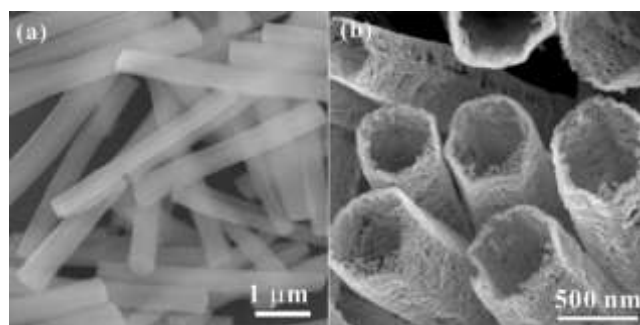

**Figure S4.** Magnified SEM image of In-MIL-68 precursors and PHIC.

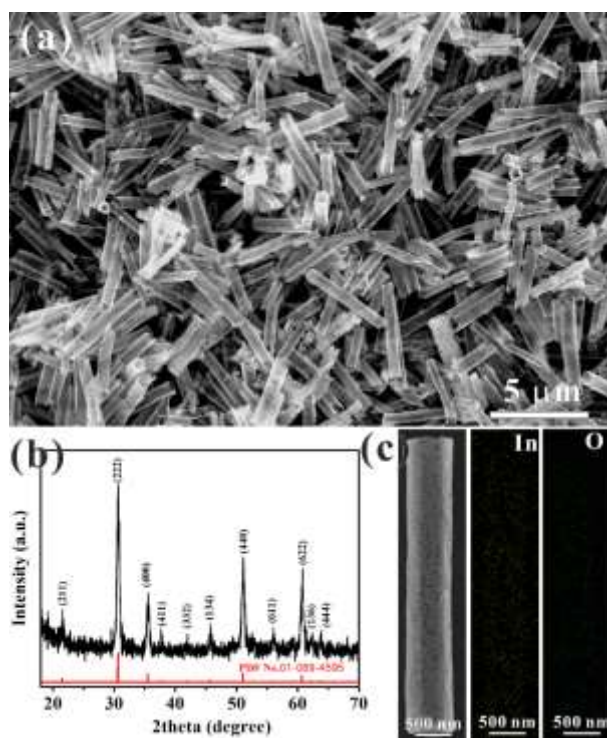

**Figure S5.** (a) SEM image of PHI, (b) XRD pattern of PHI, and (c) Corresponding elemental mapping.

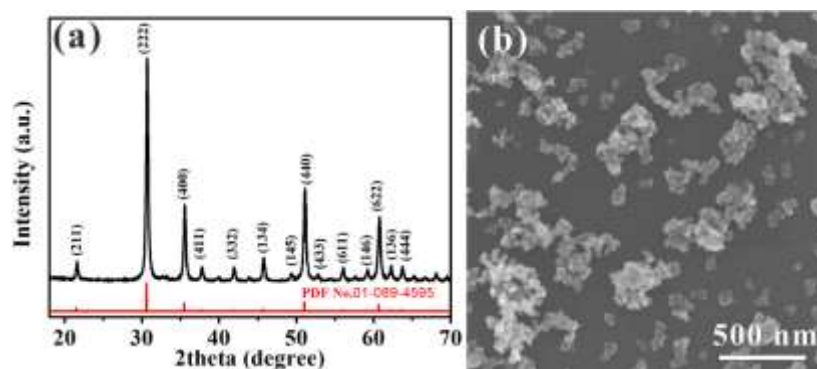

**Figure S6.** (a) XRD pattern of commercial  $\text{In}_2\text{O}_3$ , and (b) SEM image of commercial  $\text{In}_2\text{O}_3$ .

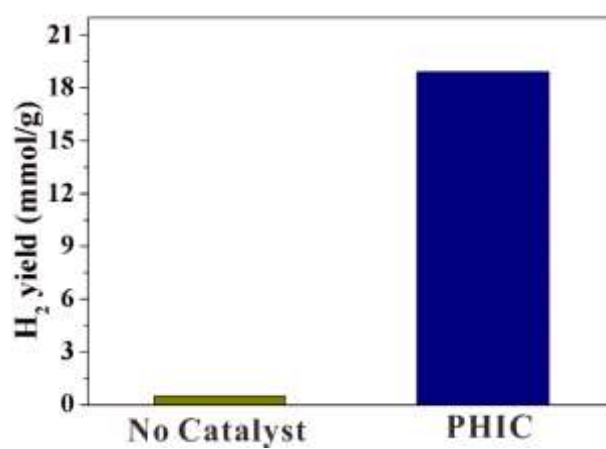

**Figure S7** Mass-normalized  $\text{H}_2$  yield for 7 h over No catalyst and PHIC.

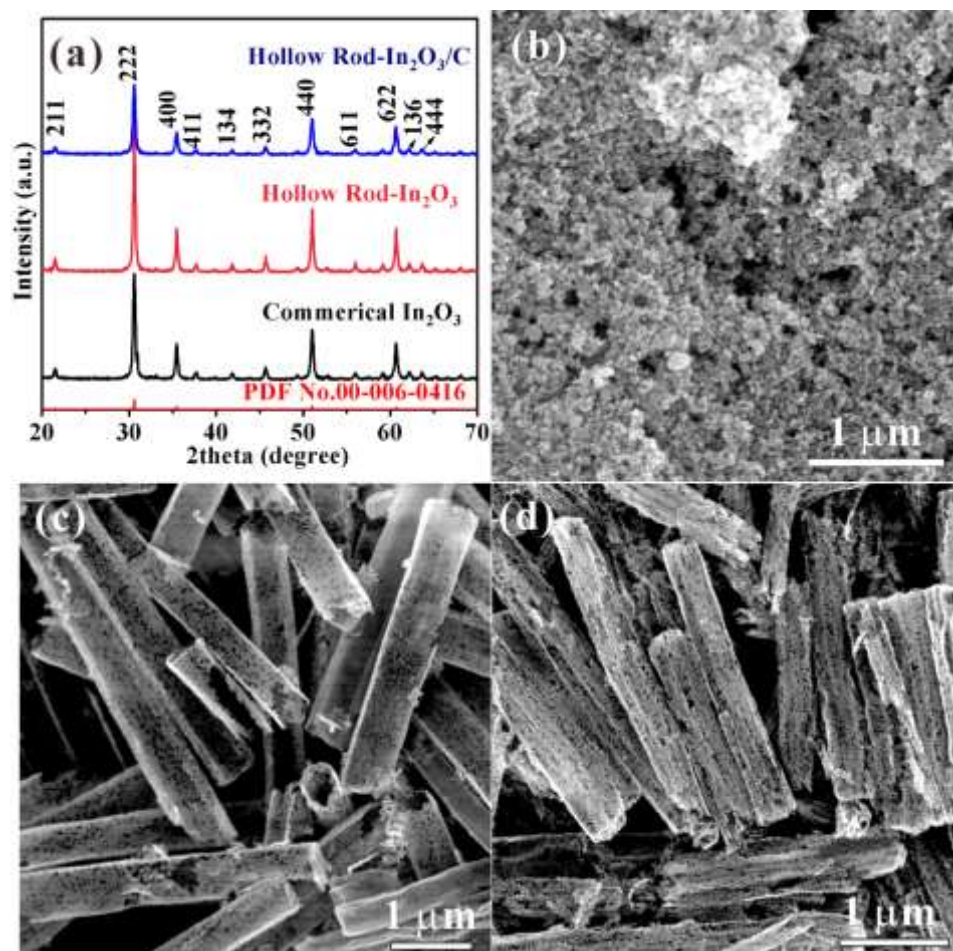

**Figure S8** XRD patterns three kinds of  $\text{In}_2\text{O}_3$  samples after catalytic reaction, SEM image of (b) commercial  $\text{In}_2\text{O}_3$  nanoparticles, (c) hollow  $\text{In}_2\text{O}_3$  rods, (d) hollow  $\text{In}_2\text{O}_3/\text{C}$  rods.

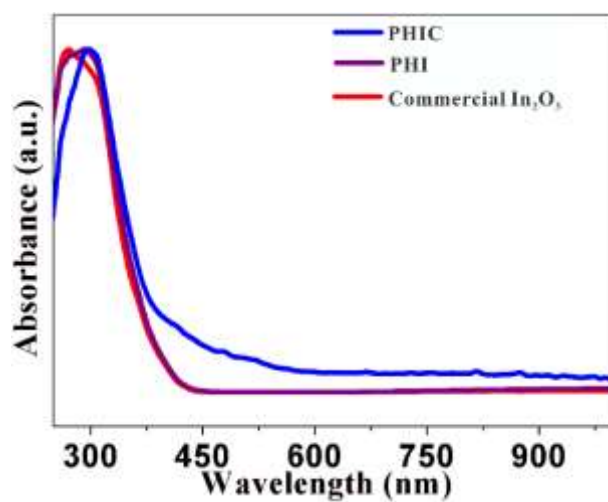

**Figure S9.** UV-vis absorption spectra of PHIC, PHI, and commercial  $\text{In}_2\text{O}_3$ .

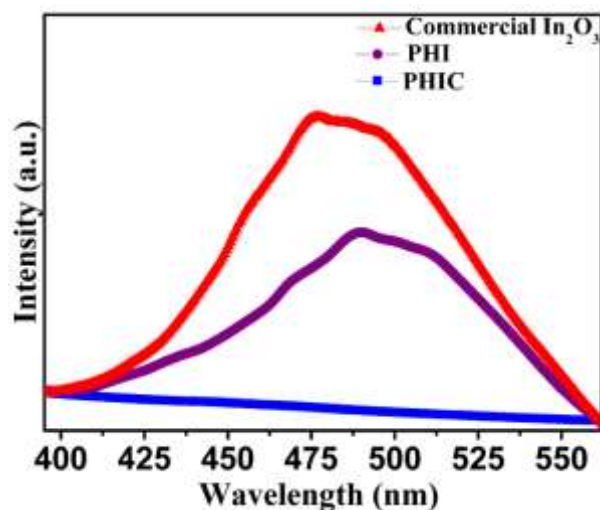

**Figure S10.** Photoluminescence spectra of commercial  $\text{In}_2\text{O}_3$ , PHI, and PHIC.

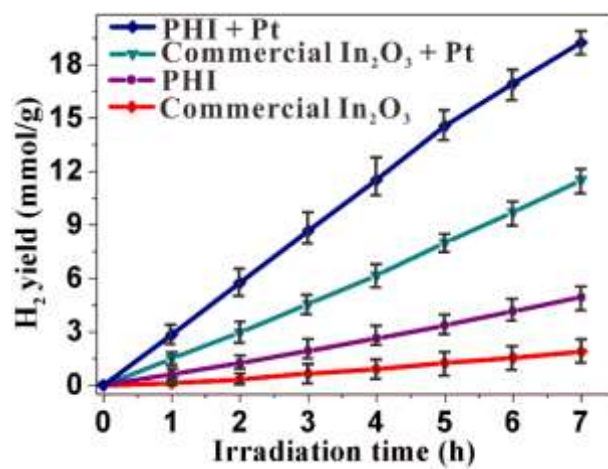

**Figure S11.** Comparison of the photocatalytic  $\text{H}_2$  evolution of PHI and commercial

$\text{In}_2\text{O}_3$  with Pt and without Pt.
